# Supplementary material for: MeHg-induced autophagy via JNK/Vps34 complex pathway promotes autophagosome accumulation and neuronal cell death
Source: PubMed Central journal article supplement (PMC6529499; doi:10.1038/s41419-019-1632-z), 2019-05-21
Supplement: 41419_2019_1632_MOESM3_ESM.pdf [file 41419_2019_1632_MOESM3_ESM.pdf]

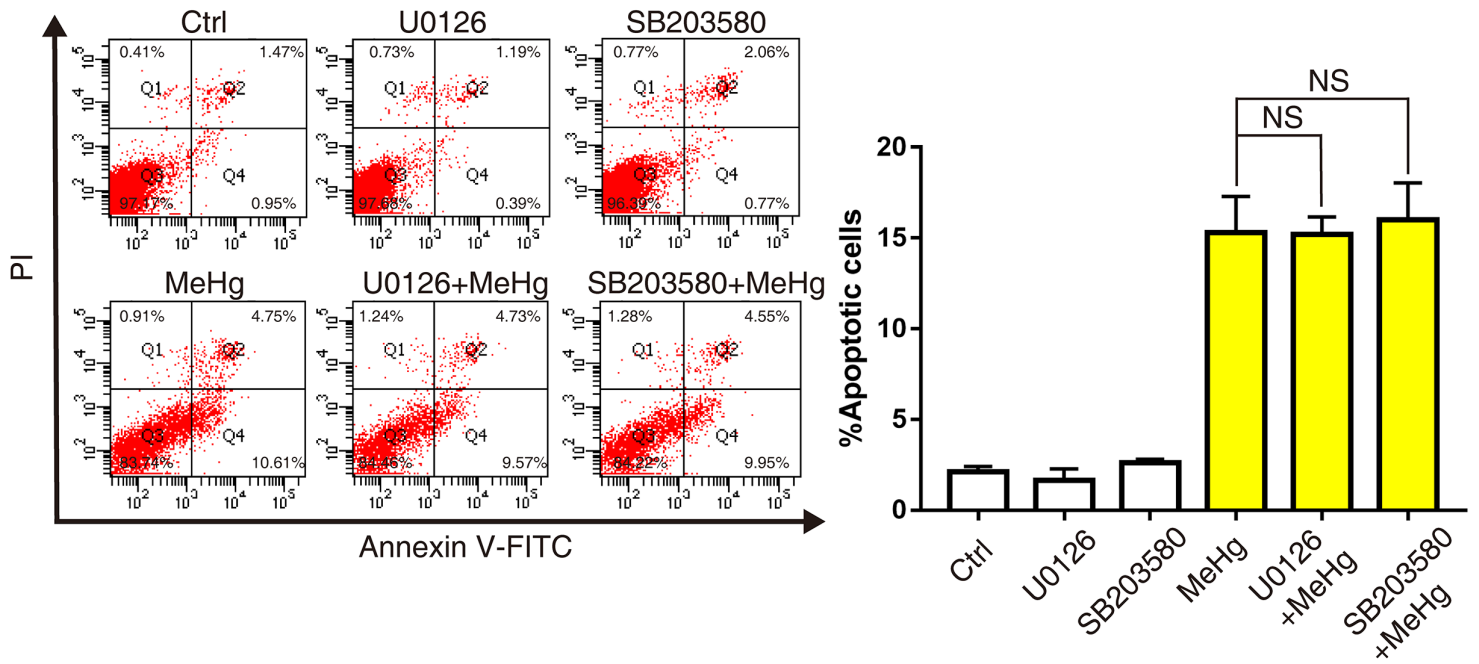

Fig S2
